# Supplementary material for: Clinical trial to evaluate pharmacokinetics and pharmacodynamics of medroxyprogesterone acetate after subcutaneous administration of Depo-Provera
Source: PubMed Central journal article supplement (PMC8051852; doi:10.1016/j.fertnstert.2020.11.002), 2021-04

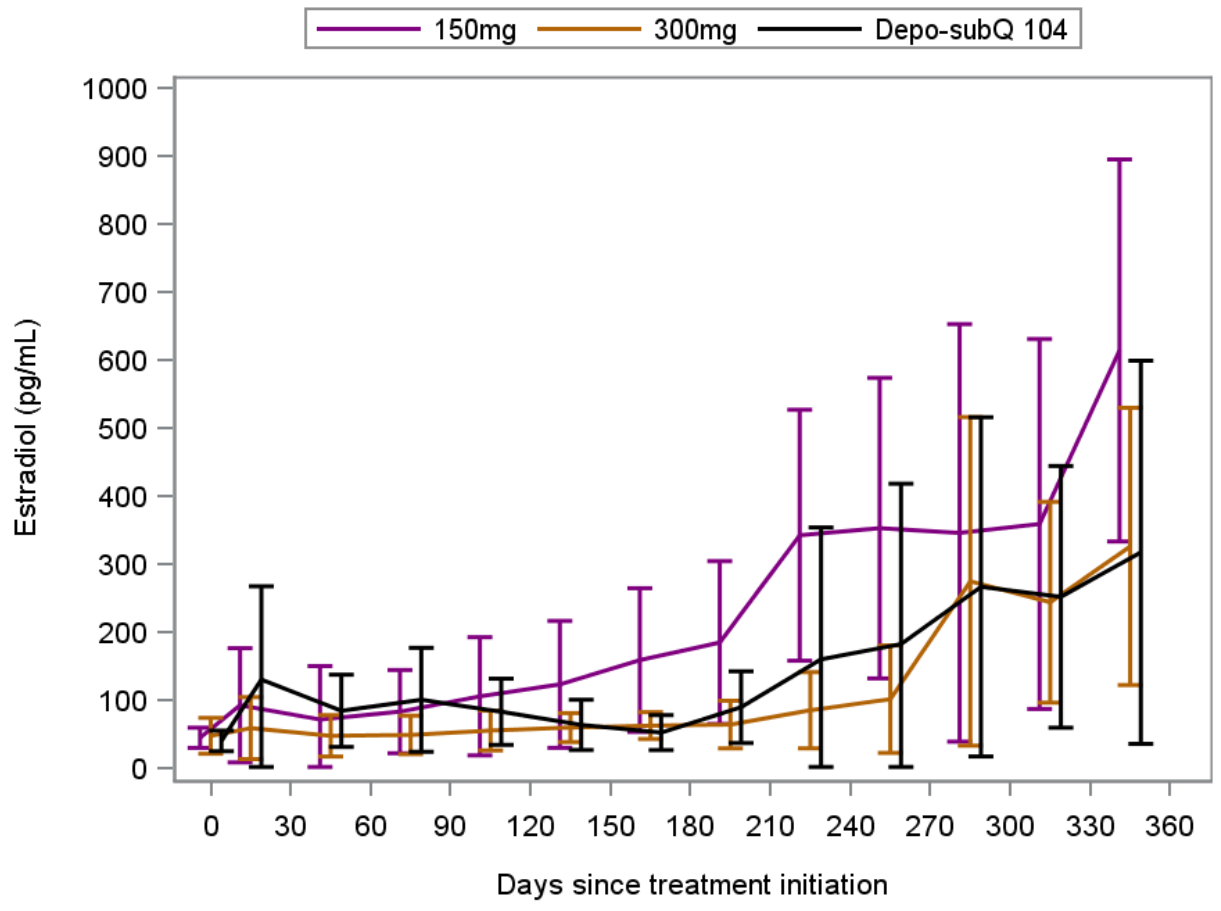

Supplement: mmc1.pdf [file mmc1.pdf]
